# Supplementary material for: Cadmium Disrupted ER Ca2+ Homeostasis by Inhibiting SERCA2 Expression and Activity to Induce Apoptosis in Renal Proximal Tubular Cells
Source: MDPI journal article supplement (doi:10.3390/ijms24065979), 2023-03-22
Supplement: s1 [file s1]

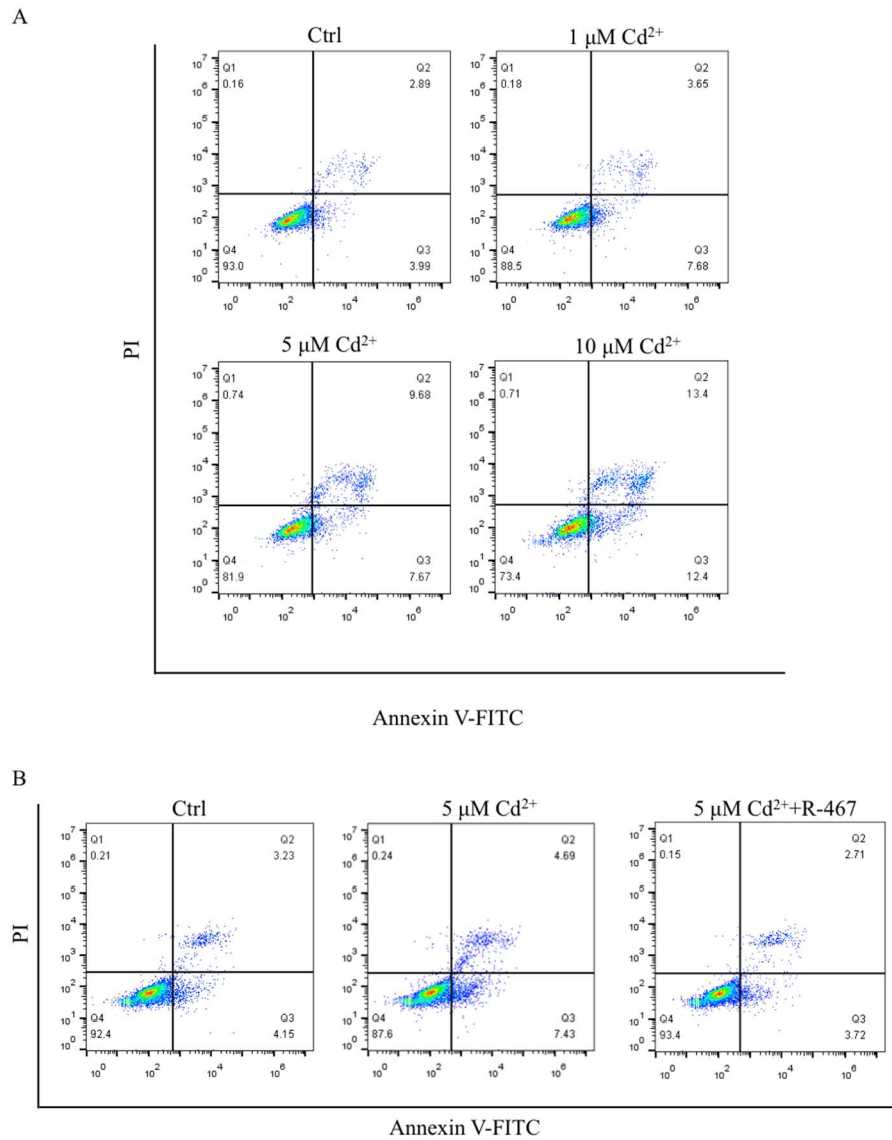

**Figure S1.** Effects of  $\text{Cd}^{2+}$  on apoptosis in mRTEC cells. After being treated with  $\text{Cd}^{2+}$  (1, 5, 10  $\mu\text{M}$ ) for 24 h, the apoptosis of mRTEC cells was determined by flow cytometry staining by Annexin V-FITC/PI.

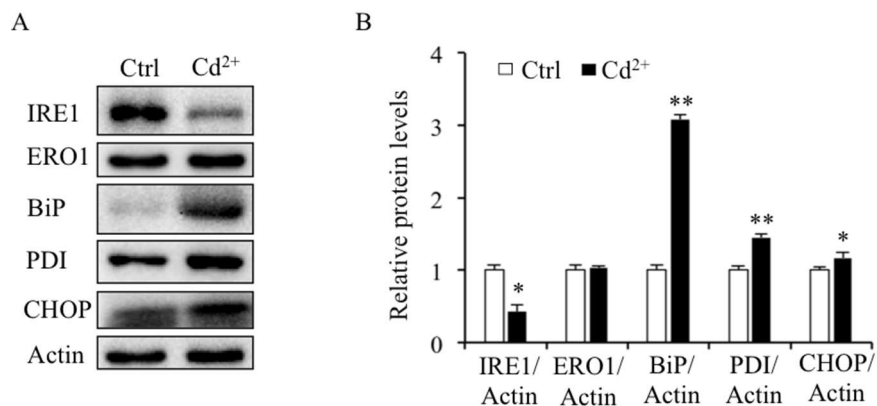

**Figure S2.** Effects of  $\text{Cd}^{2+}$  on ER stress. (A) Effect of  $\text{Cd}^{2+}$  on the expression of ER stress biomarkers IRE1, ERO1, BiP, PDI, and CHOP by Western blotting. (B) Quantification of the relative protein levels was performed using the software Image J. Statistical significance between control and treatments, \*,  $p < 0.05$ , \*\*,  $p < 0.01$ , using Student's t-test.
